# Supplementary material
Source: ML conference proceedings conference paper supplement (https://proceedings.neurips.cc/paper_files/paper/2019/hash/3a029f04d76d32e79367c4b3255dda4d-Abstract.html)
Supplement: Supplementary file [file 3a029f04d76d32e79367c4b3255dda4d-Supplemental.zip]

## A Derivation of the ELBO

Recall that we have

$$p_1 = p_1(\mathbf{z}_i, \mathbf{z}_j) = \mathcal{N}\left(\begin{bmatrix} \mathbf{0}_d \\ \mathbf{0}_d \end{bmatrix}, \begin{bmatrix} \mathbf{I}_d & \lambda \cdot \mathbf{I}_d \\ \lambda \cdot \mathbf{I}_d & \mathbf{I}_d \end{bmatrix}\right), p_0 = p_0(\mathbf{z}_i, \mathbf{z}_j) = \mathcal{N}\left(\begin{bmatrix} \mathbf{0}_d \\ \mathbf{0}_d \end{bmatrix}, \begin{bmatrix} \mathbf{I}_d & \mathbf{0}_d \\ \mathbf{0}_d & \mathbf{I}_d \end{bmatrix}\right), \quad (13)$$

for the prior distribution, and similarly, we have the approximate posterior as below:

$$q_1 = q_1(\mathbf{z}_i, \mathbf{z}_j) = \mathcal{N}\left(\begin{bmatrix} \boldsymbol{\mu}_i \\ \boldsymbol{\mu}_j \end{bmatrix}, \begin{bmatrix} \boldsymbol{\sigma}_i^2 & \gamma_{ij} \boldsymbol{\sigma}_i \boldsymbol{\sigma}_j \\ \gamma_{ij} \boldsymbol{\sigma}_i \boldsymbol{\sigma}_j & \boldsymbol{\sigma}_j^2 \end{bmatrix}\right), q_0 = q_0(\mathbf{z}_i, \mathbf{z}_j) = \mathcal{N}\left(\begin{bmatrix} \boldsymbol{\mu}_i \\ \boldsymbol{\mu}_j \end{bmatrix}, \begin{bmatrix} \hat{\boldsymbol{\sigma}}_i^2 & \mathbf{0}_d \\ \mathbf{0}_d & \hat{\boldsymbol{\sigma}}_j^2 \end{bmatrix}\right). \quad (14)$$

Now, we derive the ELBO ( $\tilde{\mathcal{L}}_{\theta, \phi}(\mathbf{x}_i, \mathbf{x}_j)$ ) when observing incomplete edges as follow:

$$\tilde{\mathcal{L}}_{\theta, \phi}(\mathbf{x}_i, \mathbf{x}_j) = \mathbb{E}_{\tilde{q}_{\phi}(\mathbf{z}_i, \mathbf{z}_j, w_{ij} | \mathbf{x}_i, \mathbf{x}_j)} [\log p_{\theta}(\mathbf{x}_i, \mathbf{x}_j | \mathbf{z}_i, \mathbf{z}_j, w_{ij})] \quad (15)$$

$$- \text{KL}(\tilde{q}_{\phi}(\mathbf{z}_i, \mathbf{z}_j, w_{ij} | \mathbf{x}_i, \mathbf{x}_j) \parallel \tilde{p}(\mathbf{z}_i, \mathbf{z}_j, w_{ij})). \quad (16)$$

Specifically,  $\tilde{p}(\mathbf{z}_i, \mathbf{z}_j, w_{ij}) = p(\mathbf{z}_i, \mathbf{z}_j | w_{ij})p(w_{ij})$ , where  $p(w_{ij}) = \mathcal{B}(\pi_0)$  is a Bernoulli variable with parameter  $\pi_0$ . When integrating  $w_{ij}$  out, we have  $\tilde{p}(\mathbf{z}_i, \mathbf{z}_j) = \pi_0 \cdot p_1 + (1 - \pi_0) \cdot p_0$ , which is essentially a mixture of two Gaussians. Similarly, the approximated posterior is  $\tilde{q}_{\phi}(\mathbf{z}_i, \mathbf{z}_j, w_{ij}) = q(\mathbf{z}_i, \mathbf{z}_j | w_{ij})q(w_{ij})$ , where  $q(w_{ij}) = \mathcal{B}(\pi_{ij})$ . When integrating  $w_{ij}$  out, we have  $q(\mathbf{z}_i, \mathbf{z}_j) = \pi_{ij} \cdot q_1 + (1 - \pi_{ij}) \cdot q_0$ .

In order to optimize the corresponding ELBO, we need the KL divergence between the inferred posterior and the proposed prior. A detailed derivation for the KL divergence is as follows:

$$\begin{aligned} \text{KL}(\tilde{q}_{\phi}(\mathbf{z}_i, \mathbf{z}_j, w_{ij}) \parallel p(\mathbf{z}_i, \mathbf{z}_j, w_{ij})) &= \int_{\mathbf{z}_i, \mathbf{z}_j} \sum_{w_{ij}} \tilde{q}_{\phi}(\mathbf{z}_i, \mathbf{z}_j, w_{ij}) \log \frac{\tilde{q}_{\phi}(\mathbf{z}_i, \mathbf{z}_j, w_{ij})}{\tilde{p}(\mathbf{z}_i, \mathbf{z}_j, w_{ij})} d\mathbf{z}_i d\mathbf{z}_j \\ &= \int_{\mathbf{z}_i, \mathbf{z}_j} \sum_{w_{ij}} q_{\phi}(\mathbf{z}_i, \mathbf{z}_j | w_{ij}) q_{\phi}(w_{ij}) \log \frac{q_{\phi}(\mathbf{z}_i, \mathbf{z}_j | w_{ij}) q_{\phi}(w_{ij})}{p(\mathbf{z}_i, \mathbf{z}_j | w_{ij}) p(w_{ij})} d\mathbf{z}_i d\mathbf{z}_j \\ &= \int \pi_{ij} \cdot q_1 \log \frac{q_1}{p_1} + \int (1 - \pi_{ij}) \cdot q_0 \log \frac{q_0}{p_0} + \sum_{w_{ij}} q_{\phi}(w_{ij}) \log \frac{q_{\phi}(w_{ij})}{p(w_{ij})} \\ &= \pi_{ij} \cdot \text{KL}(q_1 \parallel p_1) + (1 - \pi_{ij}) \cdot \text{KL}(q_0 \parallel p_0) + \text{KL}(q_{\phi}(w_{ij}) \parallel p(w_{ij})). \end{aligned} \quad (17)$$

Additionally, different from standard VAE [21], our prior  $p_1$  and the approximate posterior  $q_1$  includes correlation terms. With properties provided in [32], the KL term enjoys a closed-form expression:

$$\begin{aligned} \text{KL}(q_1 \parallel p_1) &= \frac{1}{2} \mathbf{1}_d^T [\log(1 - \lambda^2) - \log(1 - \gamma_{ij}^2) - \log \boldsymbol{\sigma}_i^2 - \log \boldsymbol{\sigma}_j^2 - 2 \\ &\quad + \frac{\boldsymbol{\sigma}_i^2 + \boldsymbol{\sigma}_j^2 - 2\lambda \gamma_{ij} \boldsymbol{\sigma}_i \boldsymbol{\sigma}_j}{1 - \lambda^2} + \frac{\boldsymbol{\mu}_i^2 + \boldsymbol{\mu}_j^2 - 2\lambda \boldsymbol{\mu}_i \boldsymbol{\mu}_j}{1 - \lambda^2}] \mathbf{1}_d. \end{aligned} \quad (18)$$

Therefore, when observing incomplete edges,  $\tilde{\mathcal{L}}_{\phi, \theta}(\mathbf{x}_i, \mathbf{x}_j)$  can be readily optimized.

## B Phrase-to-Word Alignment

Inspired by [43], we propose a phrase-by-word alignment (PWA) method to extract semantic features from the associated text. The detailed implementation is illustrated in Figure 5.

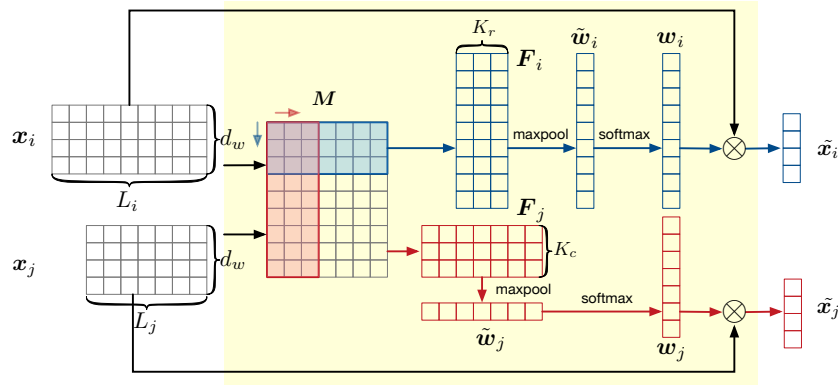

Figure 5: The detailed implementation of our phrase-to-word alignment in the encoder.

Given the associated text on a pair of vertices,  $\mathbf{x}_i \in \mathbb{R}^{d_w \times L_i}$  and  $\mathbf{x}_j \in \mathbb{R}^{d_w \times L_j}$ , where  $d_w$  is the dimension of word embeddings, and  $L_i$  and  $L_j$  are the length of each text sequence. We treat  $\mathbf{x}_j$  as the context of  $\mathbf{x}_i$ , and *vice versa*. Specifically, we first compute token-wise similarity matrix  $\mathbf{M} = \mathbf{x}_i^T \mathbf{x}_j \in \mathbb{R}^{L_i \times L_j}$ . Next, we compute row-wise and column-wise weight vectors based on  $\mathbf{M}$  to aggregate features for  $\mathbf{x}_i$  and  $\mathbf{x}_j$ . To this end, we perform 1D convolution on  $\mathbf{M}$  both row-wise and column-wise, followed by a  $\tanh(\cdot)$  activation, to capture phrase-to-word similarities. Specifically, assuming we have  $K_r$  row-wise and  $K_c$  column-wise convolutional kernels, noted as  $\mathbf{U} \in \mathbb{R}^{K_r \times L_j \times l}$  and  $\mathbf{V} \in \mathbb{R}^{K_c \times L_i \times l}$ , respectively.  $l$  is the size of convolutional kernels. Then we have

$$\mathbf{F}_i = \tanh(\mathbf{M}^T \otimes \mathbf{U}) \in \mathbb{R}^{L_i \times K_r}, \quad \mathbf{F}_j = \tanh(\mathbf{M} \otimes \mathbf{V}) \in \mathbb{R}^{L_j \times K_c}, \quad (19)$$

where  $\otimes$  is the 1-D convolutional operator. We then aggregate via max-pooling on the second dimension to combine the convolutional outputs, thus collapsing them into 1D arrays, defined as

$$\tilde{\mathbf{w}}_i = \text{max-pool}(\mathbf{F}_i) \in \mathbb{R}^{L_i}, \quad \tilde{\mathbf{w}}_j = \text{max-pool}(\mathbf{F}_j) \in \mathbb{R}^{L_j}. \quad (20)$$

After softmax normalization, we have the phrase-to-word alignment vectors

$$\mathbf{w}_i = \text{softmax}(\tilde{\mathbf{w}}_i) \in \mathbb{R}^{L_i}, \quad \mathbf{w}_j = \text{softmax}(\tilde{\mathbf{w}}_j) \in \mathbb{R}^{L_j}. \quad (21)$$

The final text embeddings are given by

$$\tilde{\mathbf{x}}_i = \mathbf{x}_i \mathbf{w}_i \in \mathbb{R}^{d_w}, \quad \tilde{\mathbf{x}}_j = \mathbf{x}_j \mathbf{w}_j \in \mathbb{R}^{d_w}. \quad (22)$$

## C Experiments

### C.1 Experimental Setup

To be consistent with previous research, the embedding dimension is set to 200 for all the approaches (100 for *semantic* embedding and 100 for *structure* embedding in our model). The kernel size for our phrase-to-word alignment module is fix to 5, and 200 kernels (for both  $K_i$  and  $K_j$ ) are used. On top of the concatenation of the *semantic* and *structure* embedding, our encoder employs a one-hidden-layer MLP to infer the latent variables  $(z_i, z_j)$ , and is the same for the decoder.  $\tanh$  is applied as the activation function. Adam [20] with a constant learning rate of  $1 \times 10^{-4}$  is used for optimization. The hyper-parameter  $\lambda, \alpha$  is fixed to 0.99 and 0.2, respectively, in all our experiments, and the sensitivity analysis of these two hyper-parameters are provided in Sec 5.2. The hyper-parameter  $\pi_0$  is set to be the sparsity level for each dataset, as shown in Table 1.

### C.2 Link Prediction

The complete link-prediction results with various training edges ratios are shown in Table 5, 6, 7.

Table 5: AUC scores for link prediction on the CORA dataset.

| % Training Edges | 15%             | 25%             | 35%             | 45%             | 55%             | 65%             | 75%             | 85%             | 95%             |
|------------------|-----------------|-----------------|-----------------|-----------------|-----------------|-----------------|-----------------|-----------------|-----------------|
| MMB [3]          | 54.7            | 57.1            | 59.5            | 61.9            | 64.9            | 67.8            | 71.1            | 72.6            | 75.9            |
| LINE [37]        | 55.0            | 58.6            | 66.4            | 73.0            | 77.6            | 82.8            | 85.6            | 88.4            | 89.3            |
| Node2Vec [16]    | 55.9            | 62.4            | 66.1            | 75.0            | 78.7            | 81.6            | 85.9            | 87.3            | 88.2            |
| DeepWalk [31]    | 56.0            | 63.0            | 70.2            | 75.5            | 80.1            | 85.2            | 85.3            | 87.8            | 90.3            |
| TADW [49]        | 86.6            | 88.2            | 90.2            | 90.8            | 90.0            | 93.0            | 91.0            | 93.4            | 92.7            |
| CENE [36]        | 72.1            | 86.5            | 84.6            | 88.1            | 89.4            | 89.2            | 93.9            | 95.0            | 95.9            |
| CANE [40]        | 86.8            | 91.5            | 92.2            | 93.9            | 94.6            | 94.9            | 95.6            | 96.6            | 97.7            |
| WANE [34]        | 91.7            | 93.3            | 94.1            | 95.7            | 96.2            | 96.9            | 97.5            | 98.2            | 99.1            |
| Naive-VAE        | 60.2            | 65.6            | 67.8            | 77.8            | 80.2            | 83.8            | 87.7            | 88.1            | 90.1            |
| VGAE [22]        | 63.9            | 72.1            | 74.3            | 80.9            | 84.3            | 86.0            | 88.1            | 88.7            | 90.5            |
| PWA              | 92.2±0.6        | 93.8±0.3        | 95.6±0.4        | 96.4±0.3        | 96.8±0.2        | 97.4±0.3        | 97.7±0.3        | 98.4±0.2        | 98.9±0.2        |
| VHE              | <b>94.4±0.3</b> | <b>96.5±0.3</b> | <b>97.6±0.2</b> | <b>97.7±0.4</b> | <b>98.3±0.2</b> | <b>98.4±0.2</b> | <b>99.0±0.3</b> | <b>99.1±0.2</b> | <b>99.4±0.2</b> |

Table 6: AUC scores for link prediction on the HEPTh dataset.

| % Training Edges | 15%             | 25%             | 35%             | 45%             | 55%             | 65%             | 75%             | 85%             | 95%             |
|------------------|-----------------|-----------------|-----------------|-----------------|-----------------|-----------------|-----------------|-----------------|-----------------|
| MMB [3]          | 54.6            | 57.9            | 57.3            | 61.6            | 66.2            | 68.4            | 73.6            | 76.0            | 80.3            |
| LINE [37]        | 53.7            | 60.4            | 66.5            | 73.9            | 78.5            | 83.8            | 87.5            | 87.7            | 87.6            |
| Node2Vec [16]    | 57.1            | 63.6            | 69.9            | 76.2            | 84.3            | 87.3            | 88.4            | 89.2            | 89.2            |
| DeepWalk [31]    | 55.2            | 66.0            | 70.0            | 75.7            | 81.3            | 83.3            | 87.6            | 88.9            | 88.0            |
| TADW [49]        | 87.0            | 89.5            | 91.8            | 90.8            | 91.1            | 92.6            | 93.5            | 91.9            | 91.7            |
| CENE [36]        | 86.2            | 84.6            | 89.8            | 91.2            | 92.3            | 91.8            | 93.2            | 92.9            | 93.2            |
| CANE [40]        | 90.0            | 91.2            | 92.0            | 93.0            | 94.2            | 94.6            | 95.4            | 95.7            | 96.3            |
| WANE [34]        | 92.3            | 94.1            | 95.7            | 96.7            | 97.5            | 97.5            | 97.7            | 98.2            | 98.7            |
| Naive-VAE        | 60.8            | 65.9            | 68.1            | 78.0            | 80.7            | 84.1            | 88.8            | 88.9            | 90.5            |
| VGAE [22]        | 65.5            | 72.0            | 74.5            | 81.1            | 85.9            | 86.4            | 88.4            | 88.8            | 90.4            |
| PWA              | 92.8±0.5        | 94.2±0.3        | 96.1±0.4        | 96.7±0.3        | 97.6±0.2        | 97.8±0.2        | 97.9±0.2        | 98.6±0.3        | 99.0±0.2        |
| VHE              | <b>94.1±0.4</b> | <b>96.8±0.3</b> | <b>97.5±0.3</b> | <b>98.3±0.2</b> | <b>98.3±0.3</b> | <b>98.5±0.3</b> | <b>98.8±0.2</b> | <b>99.0±0.2</b> | <b>99.4±0.3</b> |

Table 7: AUC scores for link prediction on the ZHIHU dataset.

| % Training Edges | 15%             | 25%             | 35%             | 45%             | 55%             | 65%             | 75%             | 85%             | 95%             |
|------------------|-----------------|-----------------|-----------------|-----------------|-----------------|-----------------|-----------------|-----------------|-----------------|
| MMB [3]          | 51.0            | 51.5            | 53.7            | 58.6            | 61.6            | 66.1            | 68.8            | 68.9            | 72.4            |
| LINE [37]        | 52.3            | 55.9            | 59.9            | 60.9            | 64.3            | 66.0            | 67.7            | 69.3            | 71.1            |
| Node2Vec [16]    | 54.2            | 57.1            | 57.3            | 58.3            | 58.7            | 62.5            | 66.2            | 67.6            | 68.5            |
| DeepWalk [31]    | 56.6            | 58.1            | 60.1            | 60.0            | 61.8            | 61.9            | 63.3            | 63.7            | 67.8            |
| TADW [49]        | 52.3            | 54.2            | 55.6            | 57.3            | 60.8            | 62.4            | 65.2            | 63.8            | 69.0            |
| CENE [36]        | 56.2            | 57.4            | 60.3            | 63.0            | 66.3            | 66.0            | 70.2            | 69.8            | 73.8            |
| CANE [40]        | 56.8            | 59.3            | 62.9            | 64.5            | 68.9            | 70.4            | 71.4            | 73.6            | 75.4            |
| WANE [34]        | 58.7            | 63.5            | 68.3            | 71.9            | 74.9            | 77.0            | 79.7            | 80.0            | 82.6            |
| Naive-VAE        | 56.5            | 59.0            | 60.2            | 60.9            | 62.5            | 66.4            | 68.1            | 68.3            | 69.0            |
| VGAE [22]        | 55.9            | 59.1            | 61.9            | 62.3            | 64.6            | 67.2            | 70.1            | 70.6            | 71.2            |
| PWA              | 62.6±0.3        | 67.5±0.2        | 70.8±0.1        | 72.2±0.2        | 77.1±0.2        | 80.3±0.2        | 80.8±0.2        | 81.9±0.2        | 83.3±0.1        |
| VHE              | <b>66.8±0.4</b> | <b>71.3±0.3</b> | <b>74.1±0.2</b> | <b>75.2±0.1</b> | <b>81.6±0.2</b> | <b>84.1±0.2</b> | <b>84.7±0.2</b> | <b>85.8±0.2</b> | <b>86.4±0.2</b> |
